# Supplementary material for: Physical activity attenuates the associations of systemic immune-inflammation index with total and cause-specific mortality among middle-aged and older populations
Source: PubMed Central journal article supplement (PMC8206152; doi:10.1038/s41598-021-91324-x), 2021-06-15
Supplement: 41598_2021_91324_MOESM1_ESM.pdf [file 41598_2021_91324_MOESM1_ESM.pdf]

**Physical activity attenuates the associations of systemic immune-inflammation index with total and cause-specific mortality among middle-aged and older populations**

Hang Li, Xiulong Wu, Yansen Bai, Wei Wei, Guyanan Li, Ming Fu, Jiali Jie, Chenming Wang, Xin Guan, Yue Feng, Hua Meng, Mengying Li, Meian He, Xiaomin Zhang, Huan Guo\*

**Supplementary Tables**

**Table S1.** The associations between baseline characteristics and SII level.

**Table S2.** Sensitivity analyses for the associations between the level of SII and mortality risks among the Dongfeng-Tongji cohort.

**Table S3.** Sensitivity analyses for the associations between the level of SII and mortality risks among the NHANES 1999-2014.

**Table S4.** The associations between SII and total mortality in subgroups of cohort participants.

**Table S5.** The associations of SII with cause-specific mortality stratified by physical activity in the NHANES 1999-2014.

**Table S1. The associations between baseline characteristics and SII level.**

| <b>Variables</b>   | <b>DFTJ cohort</b>      | <b>NHANES 1999-2014</b>  |
|--------------------|-------------------------|--------------------------|
| Age                | -0.008 (-0.010, -0.007) | -0.001 (-0.002, -0.0003) |
| Male               | -0.019 (-0.043, 0.006)  | -0.094 (-0.115, -0.072)  |
| Race               |                         |                          |
| Non-Hispanic White | -                       | Ref                      |
| Non-Hispanic Black | -                       | -0.442 (-0.476, -0.409)  |
| Mexican American   | -                       | -0.102 (-0.133, -0.070)  |
| Other              | -                       | -0.144 (-0.188, -0.101)  |
| BMI                | 0.0004 (-0.002, 0.003)  | 0.005 (0.003, 0.007)     |
| Smoking            | 0.116 (0.091, 0.142)    | 0.053 (0.024, 0.083)     |
| Alcohol drinking   | -0.017 (-0.039, 0.006)  | -0.013 (-0.042, 0.017)   |
| Physically active  | -0.035 (-0.058, -0.013) | -0.090 (-0.114, -0.066)  |

**Abbreviations:** SII, systemic immune-inflammation index; DFTJ, Dongfeng-Tongji ; NHANES, National Health and Nutrition Examination Survey; BMI, body mass index.

**Note:**  $\beta$  (95%CI)s were calculated by multivariable linear regression models, with adjustment of age, sex, race (only in the NHANES 1999-2014), BMI, smoking status, alcohol drinking status, physical activity and disease history at baseline.

**Table S2. Sensitivity analyses for the associations between the level of SII and mortality risks among the Dongfeng-Tongji cohort.**

| SII category                                                                           | Total mortality  |                         | CVD mortality |                         | Cancer mortality |                         | Other causes mortality |                         |
|----------------------------------------------------------------------------------------|------------------|-------------------------|---------------|-------------------------|------------------|-------------------------|------------------------|-------------------------|
|                                                                                        | No of deaths/PYs | HR (95%CI) <sup>a</sup> | No of deaths  | HR (95%CI) <sup>a</sup> | No of deaths     | HR (95%CI) <sup>a</sup> | No of deaths           | HR (95%CI) <sup>a</sup> |
| <i>Excluded subjects who took drugs two weeks before baseline<sup>b</sup> (n=6755)</i> |                  |                         |               |                         |                  |                         |                        |                         |
| Low SII (<332)                                                                         | 1137/100052      | Ref                     | 384           | Ref                     | 446              | Ref                     | 307                    | Ref                     |
| Middle SII (332-465)                                                                   | 569/47563        | 1.12 (1.01-1.24)        | 240           | 1.41 (1.20-1.66)        | 180              | 0.88 (0.74-1.05)        | 149                    | 1.10 (0.91-1.34)        |
| High SII (>465)                                                                        | 672/471119       | 1.25 (1.14-1.38)        | 291           | 1.60 (1.38-1.87)        | 209              | 0.99 (0.84-1.17)        | 172                    | 1.22 (1.01-1.47)        |
| <i>Excluded subjects who died during the first year of follow-up (n=138)</i>           |                  |                         |               |                         |                  |                         |                        |                         |
| Low SII (<332)                                                                         | 1516/127921      | Ref                     | 555           | Ref                     | 557              | Ref                     | 404                    | Ref                     |
| Middle SII (332-465)                                                                   | 766/61131        | 1.13 (1.03-1.23)        | 335           | 1.35 (1.18-1.55)        | 226              | 0.88 (0.76-1.03)        | 205                    | 1.15 (0.97-1.36)        |
| High SII (>465)                                                                        | 891/59882        | 1.26 (1.16-1.37)        | 393           | 1.52 (1.33-1.73)        | 254              | 0.97 (0.83-1.13)        | 244                    | 1.32 (1.12-1.55)        |
| <i>Excluded subjects with baseline history of CVD and cancer (n=5915)</i>              |                  |                         |               |                         |                  |                         |                        |                         |
| Low SII (<332)                                                                         | 1011/103778      | Ref                     | 351           | Ref                     | 382              | Ref                     | 278                    | Ref                     |
| Middle SII (332-465)                                                                   | 521/49762        | 1.11 (1.00-1.23)        | 215           | 1.32 (1.11-1.56)        | 157              | 0.88 (0.73-1.07)        | 149                    | 1.16 (0.95-1.41)        |
| High SII (>465)                                                                        | 570/48368        | 1.22 (1.10-1.36)        | 245           | 1.51 (1.29-1.79)        | 168              | 0.96 (0.80-1.15)        | 157                    | 1.23 (1.01-1.49)        |

**Abbreviations:** SII, systemic immune-inflammation index; CVD, cardiovascular disease; PY, person year.

**Note:** <sup>a</sup> HR (95%CI)s were calculated in the multivariable Cox proportional hazards regression models, with adjustment for age, sex, body mass index, smoking status, alcohol drinking status, physical activity, education, and disease histories.

<sup>b</sup> Drugs included anti-coagulation drugs, thrombolytic drugs, antibiotics and aspirin.

**Table S3. Sensitivity analyses for the associations between the level of SII and mortality risks among the NHANES 1999-2014.**

| SII category                                                                            | Total mortality  |                         | CVD mortality |                         | Cancer mortality |                         | Other causes mortality |                         |
|-----------------------------------------------------------------------------------------|------------------|-------------------------|---------------|-------------------------|------------------|-------------------------|------------------------|-------------------------|
|                                                                                         | No of deaths/PYs | HR (95%CI) <sup>a</sup> | No of deaths  | HR (95%CI) <sup>a</sup> | No of deaths     | HR (95%CI) <sup>a</sup> | No of deaths           | HR (95%CI) <sup>a</sup> |
| <i>Excluded subjects who took drugs two weeks before baseline <sup>b</sup> (n=3198)</i> |                  |                         |               |                         |                  |                         |                        |                         |
| Low SII (<498)                                                                          | 1665/88858       | Ref                     | 363           | Ref                     | 396              | Ref                     | 906                    | Ref                     |
| Middle SII (498-691)                                                                    | 879/42847        | 1.09 (0.99-1.20)        | 206           | 1.00 (0.80-1.25)        | 184              | 1.03 (0.82-1.29)        | 489                    | 1.16 (1.00-1.34)        |
| High SII (>691)                                                                         | 1253/42785       | 1.38 (1.26-1.52)        | 268           | 1.26 (1.02-1.55)        | 279              | 1.35 (1.12-1.62)        | 706                    | 1.45 (1.29-1.63)        |
| <i>Excluded subjects who died during the first year of follow-up (n=377)</i>            |                  |                         |               |                         |                  |                         |                        |                         |
| Low SII (<498)                                                                          | 1919/98416       | Ref                     | 411           | Ref                     | 449              | Ref                     | 1059                   | Ref                     |
| Middle SII (498-691)                                                                    | 1038/47663       | 1.07 (0.98-1.17)        | 247           | 1.08 (0.87-1.32)        | 205              | 0.95 (0.77-1.18)        | 586                    | 1.12 (0.98-1.28)        |
| High SII (>691)                                                                         | 1507/49459       | 1.33 (1.22-1.45)        | 331           | 1.39 (1.15-1.67)        | 299              | 1.15 (0.97-1.37)        | 877                    | 1.40 (1.25-1.56)        |
| <i>Excluded subjects with baseline history of CVD and cancer (n=6579)</i>               |                  |                         |               |                         |                  |                         |                        |                         |
| Low SII (<498)                                                                          | 1167/77816       | Ref                     | 231           | Ref                     | 296              | Ref                     | 640                    | Ref                     |
| Middle SII (498-691)                                                                    | 571/37260        | 1.05 (0.92-1.20)        | 130           | 1.13 (0.84-1.52)        | 114              | 0.86 (0.62-1.20)        | 327                    | 1.13 (0.93-1.36)        |
| High SII (>691)                                                                         | 776/36555        | 1.29 (1.16-1.43)        | 153           | 1.38 (1.06-1.78)        | 152              | 1.04 (0.81-1.33)        | 471                    | 1.38 (1.22-1.57)        |

**Abbreviations:** NHANES, National Health and Nutrition Examination Survey; SII, systemic immune-inflammation index; CVD, cardiovascular disease; PY, person year.

<sup>a</sup>HR (95%CI)s were calculated in the multivariable Cox proportional hazards regression models, with adjustment for age, sex, race, body mass index, smoking status, alcohol drinking status, physical activity, education, and disease histories.

<sup>b</sup>Drugs included anti-coagulation drugs, antibiotics and aspirin.

**Table S4. The association between SII level and total mortality in subgroups of cohort participants.**

| Characteristics                | Low SII | Middle SII       | High SII         | <i>P</i> <sub>int</sub> |
|--------------------------------|---------|------------------|------------------|-------------------------|
| <b><i>DFTJ cohort</i></b>      |         |                  |                  |                         |
| Sex                            |         |                  |                  | 0.37                    |
| Male                           | Ref     | 1.17 (1.05-1.30) | 1.29 (1.16-1.42) |                         |
| Female                         | Ref     | 1.03 (0.89-1.19) | 1.19 (1.04-1.37) |                         |
| Age                            |         |                  |                  | 0.56                    |
| <65 years                      | Ref     | 1.00 (0.86-1.17) | 1.15 (0.99-1.33) |                         |
| ≥65 years                      | Ref     | 1.12 (1.02-1.24) | 1.27 (1.15-1.39) |                         |
| BMI                            |         |                  |                  | 0.09                    |
| <25 kg/m <sup>2</sup>          | Ref     | 1.07 (0.95-1.20) | 1.30 (1.17-1.44) |                         |
| ≥25 kg/m <sup>2</sup>          | Ref     | 1.21 (1.07-1.38) | 1.20 (1.05-1.37) |                         |
| Smoking status                 |         |                  |                  | 0.25                    |
| Non-smokers                    | Ref     | 1.13 (1.01-1.27) | 1.19 (1.06-1.34) |                         |
| Smokers                        | Ref     | 1.12 (0.99-1.28) | 1.34 (1.19-1.51) |                         |
| Drinking status                |         |                  |                  | 0.53                    |
| Non-drinkers                   | Ref     | 1.14 (1.03-1.27) | 1.31 (1.18-1.44) |                         |
| Drinkers                       | Ref     | 1.08 (0.93-1.25) | 1.17 (1.01-1.34) |                         |
| Physical activity status       |         |                  |                  | 0.36                    |
| Inactive                       | Ref     | 1.24 (1.04-1.48) | 1.25 (1.05-1.48) |                         |
| Active                         | Ref     | 1.09 (0.99-1.21) | 1.27 (1.15-1.39) |                         |
| <b><i>NHANES 1999-2014</i></b> |         |                  |                  |                         |
| Sex                            |         |                  |                  | 0.31                    |
| Male                           | Ref     | 1.07 (0.93-1.23) | 1.31 (1.16-1.47) |                         |
| Female                         | Ref     | 1.06 (0.94-1.21) | 1.43 (1.26-1.63) |                         |
| Age                            |         |                  |                  | 0.07                    |
| <65 years                      | Ref     | 1.02 (0.83-1.26) | 1.27 (1.08-1.50) |                         |
| ≥65 years                      | Ref     | 1.11 (1.01-1.21) | 1.45 (1.34-1.57) |                         |
| BMI                            |         |                  |                  | 0.90                    |
| <25 kg/m <sup>2</sup>          | Ref     | 1.04 (0.89-1.22) | 1.35 (1.15-1.59) |                         |
| ≥25 kg/m <sup>2</sup>          | Ref     | 1.05 (0.94-1.16) | 1.38 (1.25-1.54) |                         |
| Smoking status                 |         |                  |                  | 0.28                    |
| Non-smokers                    | Ref     | 0.97 (0.85-1.11) | 1.29 (1.14-1.46) |                         |
| Smokers                        | Ref     | 1.14 (0.99-1.30) | 1.44 (1.27-1.62) |                         |
| Drinking status                |         |                  |                  | 0.19                    |
| Non-drinkers                   | Ref     | 1.07 (0.93-1.24) | 1.44 (1.25-1.67) |                         |
| Drinkers                       | Ref     | 1.08 (0.95-1.23) | 1.32 (1.18-1.48) |                         |
| Physical activity status       |         |                  |                  | 0.04                    |
| Inactive                       | Ref     | 1.08 (0.97-1.21) | 1.43 (1.29-1.58) |                         |
| Active                         | Ref     | 1.00 (0.78-1.29) | 1.14 (0.96-1.37) |                         |

**Abbreviations:** DFTJ, Dongfeng-Tongji cohort; NHANES, National Health and Nutrition Examination Survey; SII, systemic immune-inflammation index; BMI, body mass index. Note: HR(95%CI)s were calculated in the multivariable Cox proportional hazards regression models, with adjustment for age, sex, race (only in the NHANES 1999-2014), BMI, smoking status, alcohol drinking status, physical activity, education, and disease histories, except for the stratification variable.

**Table S5.** The associations of SII level with cause-specific mortality stratified by physical activity in the NHANES 1999-2014.

| Physical activity status      | Low SII | Middle SII       | High SII         | <i>P</i> <sub>int</sub> |
|-------------------------------|---------|------------------|------------------|-------------------------|
| <b>CVD mortality</b>          |         |                  |                  | <b>0.04</b>             |
| Inactive                      | Ref     | 1.03 (0.85-1.24) | 1.44 (1.18-1.77) |                         |
| Active                        | Ref     | 1.01 (0.60-1.69) | 0.83 (0.51-1.35) |                         |
| <b>Cancer mortality</b>       |         |                  |                  | 0.47                    |
| Inactive                      | Ref     | 0.95 (0.74-1.22) | 1.18 (0.99-1.41) |                         |
| Active                        | Ref     | 1.02 (0.68-1.55) | 1.35 (0.92-1.99) |                         |
| <b>Other causes mortality</b> |         |                  |                  | 0.06                    |
| Inactive                      | Ref     | 1.16 (1.00-1.35) | 1.54 (1.36-1.74) |                         |
| Active                        | Ref     | 0.99 (0.73-1.33) | 1.17 (0.91-1.49) |                         |

**Abbreviations:** DFTJ, Dongfeng-Tongji cohort; NHANES, National Health and Nutrition Examination Survey; SII, systemic immune-inflammation index.

**Note:** HR (95%CI)s were calculated in the multivariable Cox proportional hazards regression models, with adjustment for age, sex, race (only in the NHANES 1999-2014), body mass index, smoking status, alcohol drinking status, education, and disease histories.
